# Supplementary material for: Glycosylation of Volatile Phenols in Grapes following Pre-Harvest (On-Vine) vs. Post-Harvest (Off-Vine) Exposure to Smoke
Source: MDPI journal article supplement (doi:10.3390/molecules26175277), 2021-08-31
Supplement: s1 [file s1]

## Supplementary Materials

# Glycosylation of Volatile Phenols in Grapes Following Pre-Harvest (On-Vine) vs. Post-Harvest (Off-Vine) Exposure to Smoke

Julie A. Culbert <sup>1</sup>, WenWen Jiang <sup>1</sup>, Renata Ristic <sup>2,3</sup>, Carolyn J. Puglisi <sup>2</sup>, Elizabeth C. Nixon <sup>2</sup>, Hongmei Shi <sup>2,4</sup> and Kerry L. Wilkinson <sup>2,3,\*</sup>

<sup>1</sup> The Australian Wine Research Institute, PO Box 197, Glen Osmond, SA, 5064, Australia; julie.culbert@awri.com.au (J.C.); maddy.jiang@awri.com.au (W.J.);

<sup>2</sup> The University of Adelaide, School of Agriculture, Food and Wine, PMB 1, Glen Osmond, SA, 5064, Australia; renata.ristic@adelaide.edu.au (R.R.); carolyn.puglisi@adelaide.edu.au (C.P.); eclairenixon@gmail.com (E.N.)

<sup>3</sup> The Australian Research Council Training Centre for Innovative Wine Production, PMB 1, Glen Osmond, SA, 5064, Australia

<sup>4</sup> Shandong Academy of Grape, Jinan 250100, China, shhmchina@126.com (H.S.)

\* Correspondence: kerry.wilkinson@adelaide.edu.au (K.W.); Tel.: +61-8-8313-7360

**Table S1.** Concentrations of volatile phenols (µg/kg) in control (C) and smoke-exposed (S) grapes, sampled 7 days after smoke exposure.

| Treatment          |   |              | Guaiacol  | 4-Methyl Guaiacol | Total Cresols | Syringol |
|--------------------|---|--------------|-----------|-------------------|---------------|----------|
| Viognier           | C | pre-harvest  | (1.0) nd  | nd                | nd            | nd       |
|                    |   | post-harvest | nd        | nd                | nd            | nd       |
|                    | S | pre-harvest  | (3.7) 2.3 | nd                | (1.3) 1.0     | nd       |
|                    |   | post-harvest | 2.3       | nd                | 1.3           | nd       |
| Cabernet Sauvignon | C | pre-harvest  | nd        | nd                | nd            | nd       |
|                    |   | post-harvest | nd        | nd                | nd            | nd       |
|                    | S | pre-harvest  | nd        | nd                | (1.3) nd      | nd       |
|                    |   | post-harvest | nd        | nd                | nd            | nd       |

Values are means of three replicates ( $n = 3$ ); nd = not detected. Values in parentheses are volatile phenols detected 1 day after smoke exposure (i.e., at  $t=1$ ).

**Table S2.** Concentrations of volatile phenol glycosides (µg/kg) in control (C) and smoke-exposed (S) grapes, sampled 1, 3 or 7 days after smoke exposure.

|                    |   | Treatment        | Sample Time | GuG    | GuGG | GuPG   | GuR   | 4MGR   | CrG    | CrGG | CrPG    | CrR    | PhG | PhGG | PhPG    | PhR | SyrG | SyrGG  | SyrPG | 4MSGG  | Total |
|--------------------|---|------------------|-------------|--------|------|--------|-------|--------|--------|------|---------|--------|-----|------|---------|-----|------|--------|-------|--------|-------|
| Viognier           | C | pre-harvest      | t = 1       | 1.2 d  | tr   | 11.9   | tr    | tr     | 1.7 c  | tr   | 9.4 d   | 1.8    | tr  | nd   | 6.9 c   | tr  | tr   | 1.4    | 11.1  | tr     | 45    |
|                    |   |                  | t = 3       | 1.3 d  | tr   | 12.9   | tr    | tr     | 1.9 c  | tr   | 9.7 d   | 1.8    | tr  | nd   | 7.5 c   | tr  | tr   | 1.6    | 11.9  | tr     | 48    |
|                    |   |                  | t = 7       | tr     | tr   | 23.5   | tr    | 1.3    | tr     | tr   | 11.6 d  | 2.0    | tr  | nd   | 9.4 c   | tr  | tr   | nd     | 4.1   | 1.0    | 53    |
|                    |   | post-harvest     | t = 1       | 1.1 d  | tr   | 14.2   | tr    | tr     | 1.6 c  | tr   | 10.0 d  | 1.8    | tr  | nd   | 7.5 c   | tr  | tr   | 1.5    | 12.7  | tr     | 50    |
|                    |   |                  | t = 3       | 1.1 d  | tr   | 12.3   | tr    | tr     | 1.7 c  | tr   | 8.6 d   | 1.5    | tr  | nd   | 6.8 c   | tr  | tr   | 1.4    | 11.2  | tr     | 45    |
|                    |   |                  | t = 7       | tr     | tr   | 22.1   | tr    | tr     | tr     | tr   | 11.2 d  | 1.8    | nd  | nd   | 9.0 c   | tr  | tr   | nd     | 4.1   | tr     | 48    |
|                    | S | pre-harvest      | t = 1       | 5.1 a  | 3.2  | 36.8   | 1.0   | 1.8    | 5.4 a  | tr   | 28.3 a  | 2.8    | tr  | tr   | 22.2 ab | tr  | tr   | 28.4   | 16.2  | 7.0    | 158   |
|                    |   |                  | t = 3       | 4.0 b  | 3.1  | 29.1   | tr    | 1.2    | 3.4 b  | tr   | 23.5 bc | 2.6    | tr  | tr   | 20.2 b  | tr  | tr   | 34.7   | 11.5  | 7.0    | 140   |
|                    |   |                  | t = 7       | 1.5 d  | 4.0  | 39.7   | tr    | 3.6    | 1.0 c  | tr   | 20.9 c  | 3.0    | tr  | tr   | 19.1 b  | tr  | 1.4  | 39.2   | 6.7   | 7.8    | 148   |
|                    |   | post-harvest     | t = 1       | 4.9 ab | 3.0  | 27.7   | tr    | 1.4    | 4.6 a  | nd   | 21.4 c  | 2.1    | tr  | tr   | 18.5 b  | tr  | tr   | 27.0   | 11.3  | 6.3    | 128   |
|                    |   |                  | t = 3       | 5.3 a  | 4.0  | 35.0   | tr    | 1.4    | 4.7 a  | tr   | 26.7 ab | 2.8    | 2.0 | tr   | 25.0 a  | tr  | tr   | 37.9   | 11.4  | 9.1    | 165   |
|                    |   |                  | t = 7       | 2.7 c  | 4.5  | 42.8   | tr    | 2.8    | 1.8 c  | tr   | 23.1 ab | 3.1    | tr  | tr   | 20.2 b  | tr  | 2.1  | 39.9   | 6.1   | 8.8    | 158   |
|                    | P | treatment        | <0.001      |        | ns   | <0.001 | –     | <0.001 | <0.001 | –    | <0.001  | <0.001 | –   | –    | <0.001  | –   | –    | <0.001 | ns    | <0.001 | –     |
|                    |   | treatment x time | 0.023       |        | ns   | ns     | –     | ns     | 0.008  | –    | 0.017   | ns     | –   | –    | 0.026   | –   | –    | ns     | ns    | ns     | –     |
| Cabernet Sauvignon | C | pre-harvest      | t = 1       | tr     | tr   | 2.3    | 2.5   | tr     | 4.4    | tr   | 4.1     | 1.4    | tr  | nd   | 3.8     | tr  | tr   | 3.0    | 4.2   | tr     | 26    |
|                    |   |                  | t = 3       | tr     | tr   | 2.3    | 2.8   | tr     | 4.6    | tr   | 3.5     | 1.7    | tr  | tr   | 3.8     | tr  | tr   | 3.2    | 4.9   | tr     | 27    |
|                    |   |                  | t = 7       | tr     | tr   | 2.8    | tr    | tr     | tr     | tr   | 2.5     | 1.6    | tr  | tr   | 2.7     | tr  | tr   | 2.1    | tr    | tr     | 12    |
|                    |   | post-harvest     | t = 1       | tr     | tr   | 2.0    | 2.2   | tr     | 3.3    | tr   | 3.4     | 1.3    | tr  | nd   | 3.0     | tr  | tr   | 3.0    | 4.0   | tr     | 22    |
|                    |   |                  | t = 3       | tr     | tr   | 2.1    | 2.5   | tr     | 4.5    | tr   | 3.5     | 1.5    | tr  | nd   | 3.1     | tr  | tr   | 2.5    | 4.3   | tr     | 24    |
|                    |   |                  | t = 7       | tr     | tr   | 2.6    | tr    | tr     | tr     | tr   | 2.4     | 1.5    | tr  | nd   | 2.6     | tr  | tr   | 1.9    | tr    | tr     | 11    |
|                    | S | pre-harvest      | t = 1       | tr     | tr   | 2.2    | 1.8   | tr     | 3.4    | tr   | 3.8     | 1.9    | tr  | tr   | 3.9     | tr  | tr   | 9.3    | 4.1   | 1.2    | 32    |
|                    |   |                  | t = 3       | tr     | tr   | 2.0    | 1.9   | tr     | 3.1    | tr   | 4.4     | 2.7    | tr  | tr   | 4.4     | tr  | tr   | 10.6   | 3.9   | 1.4    | 34    |
|                    |   |                  | t = 7       | tr     | tr   | 3.0    | tr    | 1.0    | tr     | tr   | 2.8     | 3.1    | tr  | tr   | 3.3     | 1.3 | tr   | 12.3   | 1.6   | 1.8    | 30    |
|                    |   | post-harvest     | t = 1       | tr     | tr   | 2.2    | 2.0   | tr     | 5.0    | tr   | 3.8     | 1.9    | tr  | tr   | 3.9     | tr  | tr   | 7.6    | 3.7   | 1.2    | 31    |
|                    |   |                  | t = 3       | tr     | tr   | 2.1    | 1.9   | tr     | 3.3    | tr   | 3.8     | 2.0    | tr  | tr   | 3.8     | tr  | tr   | 9.1    | 3.9   | 1.2    | 31    |
|                    |   |                  | t = 7       | tr     | tr   | 2.8    | tr    | 1.0    | tr     | tr   | 2.9     | 2.8    | tr  | tr   | 3.7     | 1.1 | tr   | 9.2    | 1.4   | 1.5    | 26    |
|                    | P | treatment        | –           |        | –    | ns     | 0.041 | ns     | ns     | –    | ns      | 0.003  | –   | –    | 0.033   | ns  | –    | <0.001 | ns    | ns     | –     |
|                    |   | treatment x time | –           |        | –    | ns     | ns    | ns     | ns     | –    | ns      | ns     | –   | –    | ns      | –   | –    | ns     | ns    | ns     | –     |

Sample times are days after smoke exposure. Values are means of three replicates ( $n = 3$ ) measured as syringol glucose-glucoside equivalents; nd = not detected; tr = trace (i.e., 0.5–1 µg/kg). Different letters within a column (by variety) indicate statistical significance ( $P = 0.05$ , two-way ANOVA); ns = not significant. Gu = guaiacol; 4MG = 4-methylguaiacol; Cr = cresol; Ph = phenol; Syr = syringol; 4MS = 4-methylsyringol; G = glucoside; GG = glucose-glucoside; PG = pentose-glucoside; R = rutinoides.

**Table S3.** Concentrations of volatile phenol glycosides (µg/L) in wines made from control (C) and smoke-exposed (S) grapes.

|                    | Treatment | GuG          | GuGG   | GuPG | GuR    | 4MGR | CrG   | CrGG  | CrPG | CrR    | PhG   | PhGG   | PhPG | PhR    | SyrG   | SyrGG | SyrPG | 4MSGG | Total |     |
|--------------------|-----------|--------------|--------|------|--------|------|-------|-------|------|--------|-------|--------|------|--------|--------|-------|-------|-------|-------|-----|
| Viognier           | C         | pre-harvest  | 1.3 b  | tr   | 26.2 b | tr   | 1.5 b | 4.7   | tr   | 12.9 b | 2.7 b | 1.0 b  | tr   | 9.6 b  | tr     | tr    | nd    | 4.1 b | tr    | 64  |
|                    |           | post-harvest | 1.1 b  | tr   | 23.2 b | tr   | 1.2 b | 4.6   | tr   | 12.3 b | 2.4 b | 1.1 b  | tr   | 9.1 b  | tr     | tr    | nd    | 3.7 b | tr    | 59  |
|                    | S         | pre-harvest  | 3.4 a  | tr   | 39.2 a | tr   | 4.4 a | 5.5   | tr   | 21.0 a | 3.9 a | 5.5 a  | tr   | 18.0 a | 1.2    | 3.0   | 27.0  | 6.6 a | 3.2   | 142 |
|                    |           | post-harvest | 4.1 a  | tr   | 38.2 a | tr   | 3.5 a | 6.4   | tr   | 20.3 a | 3.8 a | 6.1 a  | tr   | 15.7 a | 1.2    | 3.7   | 22.2  | 6.0 a | 2.8   | 134 |
|                    |           | P            | <0.001 | –    | 0.002  | –    | 0.046 | ns    | –    | 0.004  | 0.004 | <0.001 | –    | 0.001  | ns     | ns    | ns    | 0.002 | ns    | –   |
| Cabernet Sauvignon | C         | pre-harvest  | tr     | tr   | 2.4    | 2.3  | tr    | 4.5 b | tr   | 2.4    | 1.6 b | 1.2 b  | tr   | 4.2 b  | 1.1 b  | tr    | nd    | tr    | tr    | 20  |
|                    |           | post-harvest | tr     | tr   | 2.3    | 2.0  | tr    | 5.5 a | tr   | 2.4    | 1.4 b | 1.1 b  | tr   | 4.5 b  | 1.0 b  | tr    | nd    | tr    | tr    | 20  |
|                    | S         | pre-harvest  | tr     | tr   | 2.6    | 2.2  | 1.0   | 4.5 b | tr   | 2.7    | 2.8 a | 3.2 a  | tr   | 5.3 a  | 2.2 a  | 1.2   | 7.2   | 2.0   | tr    | 37  |
|                    |           | post-harvest | tr     | tr   | 2.7    | 2.1  | tr    | 5.8 a | tr   | 3.0    | 2.5 a | 3.4 a  | tr   | 5.8 a  | 2.0 a  | 1.1   | 6.5   | 1.5   | tr    | 36  |
|                    |           | P            | –      | –    | ns     | ns   | –     | 0.001 | –    | ns     | 0.002 | <0.001 | –    | 0.002  | <0.001 | ns    | ns    | ns    | –     | –   |

Values are means of three replicates ( $n = 3$ ) measured as syringol glucose-glucoside equivalents; nd = not detected; tr = trace (i.e.  $< 0.5\text{--}1 \mu\text{g/kg}$ ). Different letters within a column (by variety) indicate statistical significance ( $p = 0.05$ , one-way ANOVA); ns = not significant. Gu = guaiacol; 4MG = 4-methylguaiacol; Cr = cresol; Ph = phenol; Syr = syringol; 4MS = 4-methylsyringol; G = glucoside; GG = glucose-glucoside; PG = pentose-glucoside; R = rutinoside.

**Table S4.** Mean intensity ratings for sensory attributes of Viognier and Cabernet Sauvignon wines made from control (C) and smoke-affected (S) grapes.

| Attribute           | Viognier    |              |             |              |         | Cabernet Sauvignon |              |             |              |       |
|---------------------|-------------|--------------|-------------|--------------|---------|--------------------|--------------|-------------|--------------|-------|
|                     | C           |              | S           |              | P       | C                  |              | S           |              | P     |
|                     | Pre-harvest | Post-harvest | Pre-harvest | Post-harvest |         | Pre-harvest        | Post-harvest | Pre-harvest | Post-harvest |       |
| fruit aroma         | 4.0 a       | 3.9 ab       | 3.5 bc      | 3.3 c        | 0.010   | 3.8                | 3.9          | 4.0         | 3.7          | ns    |
| smoke aroma         | 2.1 b       | 2.2 b        | 3.2 a       | 3.5 a        | <0.0005 | 2.5 a              | 1.8 b        | 2.5 ab      | 2.8 a        | 0.047 |
| cold ash aroma      | 1.9 b       | 2.3 b        | 3.4 a       | 3.4 a        | <0.0005 | 2.1                | 1.7          | 2.1         | 2.1          | ns    |
| earthy aroma        | 2.0         | 2.3          | 2.4         | 3.0          | ns      | 2.4                | 2.5          | 2.1         | 2.4          | ns    |
| medicinal aroma     | 2.4         | 2.4          | 2.7         | 2.6          | ns      | 1.6                | 1.6          | 2.1         | 1.9          | ns    |
| burnt rubber aroma  | 1.2         | 1.5          | 1.7         | 2.0          | ns      | 0.7                | 1.0          | 1.2         | 1.1          | ns    |
| fruit flavor        | 3.7 a       | 3.5 a        | 3.0 b       | 2.7 b        | <0.0001 | 3.7                | 3.5          | 3.7         | 3.6          | ns    |
| smoky flavor        | 2.0 c       | 2.0 c        | 3.0 b       | 4.0 a        | <0.0001 | 2.3                | 1.5          | 1.9         | 1.7          | ns    |
| medicinal flavor    | 2.9         | 2.4          | 2.3         | 2.9          | ns      | 1.2                | 1.9          | 1.9         | 2.0          | ns    |
| burnt rubber flavor | 0.9 b       | 1.3 ab       | 1.9 a       | 2.0 a        | 0.029   | 0.6 b              | 0.9 ab       | 0.9 ab      | 1.3 a        | 0.033 |
| ashy aftertaste     | 2.5 b       | 2.6 b        | 3.0 b       | 3.7 a        | 0.005   | 2.0                | 2.1          | 2.2         | 2.3          | ns    |
| woody aftertaste    | 2.2         | 2.5          | 2.6         | 2.9          | ns      | 2.8                | 2.2          | 2.3         | 2.8          | ns    |
| metallic            | 1.8         | 1.7          | 1.3         | 1.4          | ns      | 1.0                | 1.2          | 1.1         | 1.0          | ns    |
| acidity             | 4.0         | 4.1          | 3.9         | 3.6          | ns      | 4.3                | 4.1          | 4.2         | 4.2          | ns    |
| hotness             | 3.8         | 3.4          | 3.6         | 3.8          | ns      | 3.5 a              | 3.1 b        | 3.3 ab      | 3.1 b        | 0.047 |
| bitterness          | 3.8         | 3.8          | 3.7         | 3.8          | ns      | 3.3                | 3.3          | 3.2         | 3.5          | ns    |
| drying              | 3.5         | 3.8          | 3.8         | 3.7          | ns      | 3.8                | 3.7          | 3.4         | 3.8          | ns    |

Values are means for one wine per treatment presented to 30 judges. Different letters within rows (by variety) indicate statistical significance ( $P = 0.05$ , two-way ANOVA); ns = not significant.

**Table S5.** Bunch weights and berry numbers for Viognier and Cabernet Sauvignon grapes exposed to gaseous volatile phenols (for 60 hours) post-harvest.

| Treatment                  |         | Bunch Weight (g) |                             | Berry Number |
|----------------------------|---------|------------------|-----------------------------|--------------|
|                            |         | Pre-Treatment    | Post-Treatment <sup>a</sup> |              |
| control Viognier           | bunch 1 | 126.94           | –                           | 98           |
|                            | bunch 2 | 225.56           | –                           | 182          |
|                            | bunch 3 | 186.73           | –                           | 150          |
| treated Viognier           | bunch 1 | 331.59           | 305.51 (7.9%)               | 247          |
|                            | bunch 2 | 159.88           | 146.97 (8.1%)               | 126          |
|                            | bunch 3 | 99.45            | 90.23 (9.3%)                | 71           |
| control Cabernet Sauvignon | bunch 1 | 77.85            | –                           | 72           |
|                            | bunch 2 | 120.97           | –                           | 142          |
|                            | bunch 3 | 62.40            | –                           | 70           |
| treated Cabernet Sauvignon | bunch 1 | 70.34            | 62.15 (11.6%)               | 87           |
|                            | bunch 2 | 87.49            | 75.16 (14.1%)               | 110          |
|                            | bunch 3 | 92.47            | 83.25 (10.0%)               | 103          |

<sup>a</sup>Percentage change in bunch weight shown in brackets.
